# Supplementary material for: Human DMBT1-Derived Cell-Penetrating Peptides for Intracellular siRNA Delivery
Source: PubMed Central journal article supplement — Mol Ther Nucleic Acids. 2017 Jun 29;8:264–76. doi: 10.1016/j.omtn.2017.06.020 (PMC5514624; doi:10.1016/j.omtn.2017.06.020), 2017-06-29
Supplement: mmc1.pdf [file mmc1.pdf]

**OMTN, Volume 8**

**Supplemental Information**

**Human DMBT1-Derived Cell-Penetrating Peptides  
for Intracellular siRNA Delivery**

**Martina Tuttolomondo, Cinzia Casella, Pernille Lund Hansen, Ester Polo, Luciana M. Herda, Kenneth A. Dawson, Henrik J. Ditzel, and Jan Mollenhauer**

**SUPPLEMENTAL MATERIAL**

**SUPPLEMENTAL DATA ITEMS**

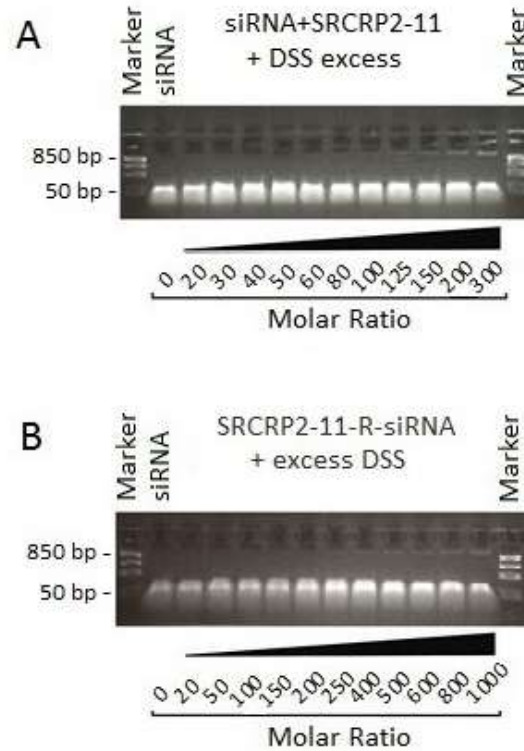

**Figure S1. Dextran sulfate sodium competition assay showing tdTomato1 siRNA release from DMBT1-derived peptide-tdTomato1 siRNA complexes.** SRCRP2-11-siRNA (A) and SRCRP2-11-R-siRNA (B) complexes. Conditions used for complex formation were the same used in the binding assay. Free tdTomato1 siRNA was completely released at all peptide-siRNA molar ratios.

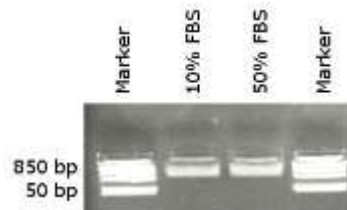

**Figure S2. Agarose gel electrophoresis of FBS alone showing bands at 850 bp.** 10% and 50% FBS solutions in PBS resulted in bands at 850 bp as determined by electrophoresis and ethidium bromide staining.

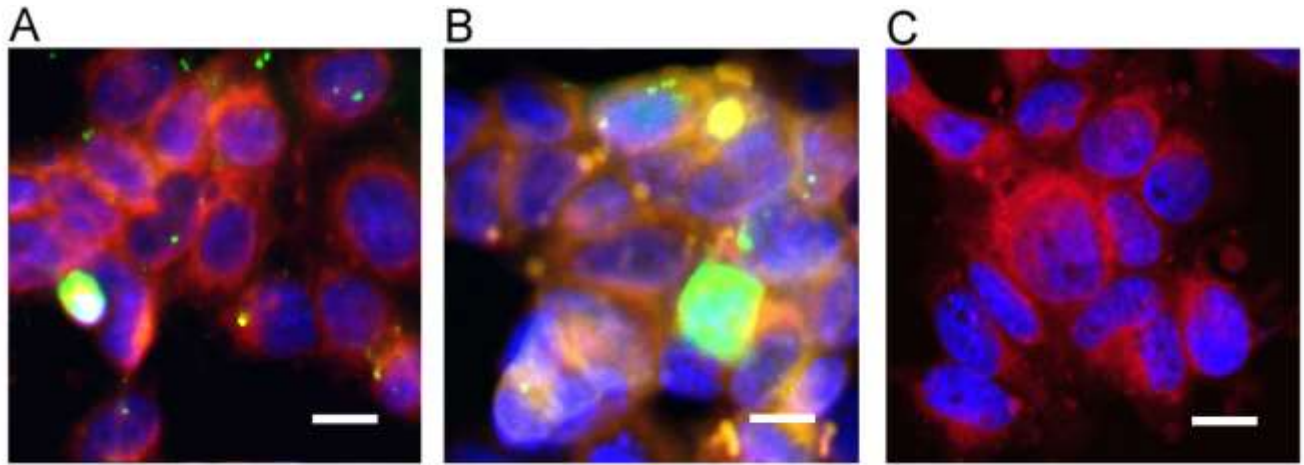

**Figure S3. Magnification of selected areas of merged images from Figure 7.** MCF7 cells transfected with FITC-SRCRP2-11-Cy3-siRNA (A, detail from figure 7B), MCF7 cells transfected with FITC-SRCRP2-11-R-Cy3-siRNA (B, detail from figure 7D), and MCF7 cells transfected with FITC-SRCRP2-11-Cy3-siRNA (C, detail from figure 7E). Blue is DAPI staining of nuclei, red is CellMask™ Deep Red plasma membrane staining of plasma membrane, green is FITC-labeled peptides, yellow is Cy3-labeled siRNA. Scale bar is 10  $\mu\text{m}$ .

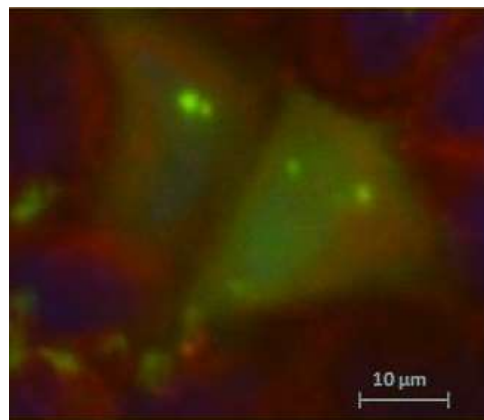

**Figure S4. Confocal microscopy image of MCF7 cells treated with FITC-SRCRP2-11 peptide.** Compartmentalization and cytoplasmic FITC-signal shown at increased magnification for MCF7 cells transfected with FITC-SRCRP2-11. Blue is DAPI staining of nuclei and red is CellMask™ Deep Red plasma membrane staining of plasma membrane.

|            |                            | <b>SRCRP2-11-siRNA</b> | <b>SRCRP2-11-R-siRNA</b> |
|------------|----------------------------|------------------------|--------------------------|
| <b>TEM</b> | Average size (nm)          | 112.7                  | 105.2                    |
|            | Standard deviation         | 60.4                   | 75.8                     |
|            | Standard error of the mean | 6.0                    | 8.7                      |
|            | Size range (nm)            | 20-350                 | 10-480                   |
| <b>DLS</b> | Average size (nm)          | 105.0                  | 108.0                    |
|            | Standard deviation         | 57.0                   | 31.0                     |
|            | Standard error of the mean | 12.7                   | 6.9                      |
|            | Size range (nm)            | 30-500                 | 10-800                   |

**Table S1. Size comparison of peptide-siRNA complexes (SRCRP2-11-siRNA and SRCRP2-11-R-siRNA) as determined by TEM (transmission electron microscopy) and DLS (Dynamic light scattering).** Size comparison of the complexes by TEM and DLS. For TEM, particle size was determined by measuring the particle length with the software NIH ImageJ software<sup>1</sup>.

#### **SUPPLEMENTAL REFERENCES**

1. Schneider, C. a, Rasband, W. S. & Eliceiri, K. W. NIH Image to ImageJ: 25 years of image analysis. *Nat. Methods* **9**, 671–675 (2012).
